# Supplementary material
Source: PubMed Central journal article supplement (PMC8023393)
Supplement: NIHMS1678949-supplement-Supp__Fig__3.pdf [file NIHMS1678949-supplement-Supp__Fig__3.pdf]

Observed richness

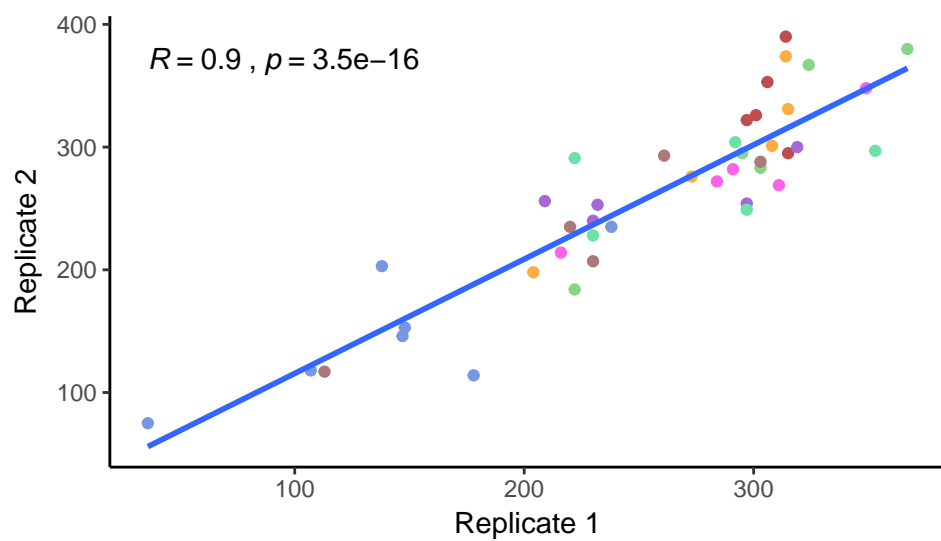

Chao1 richness

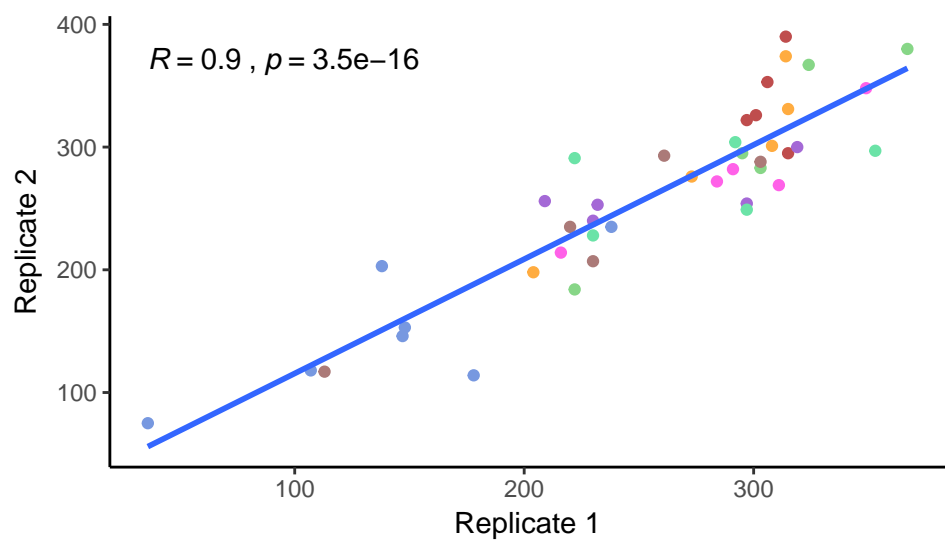

Shannon diversity

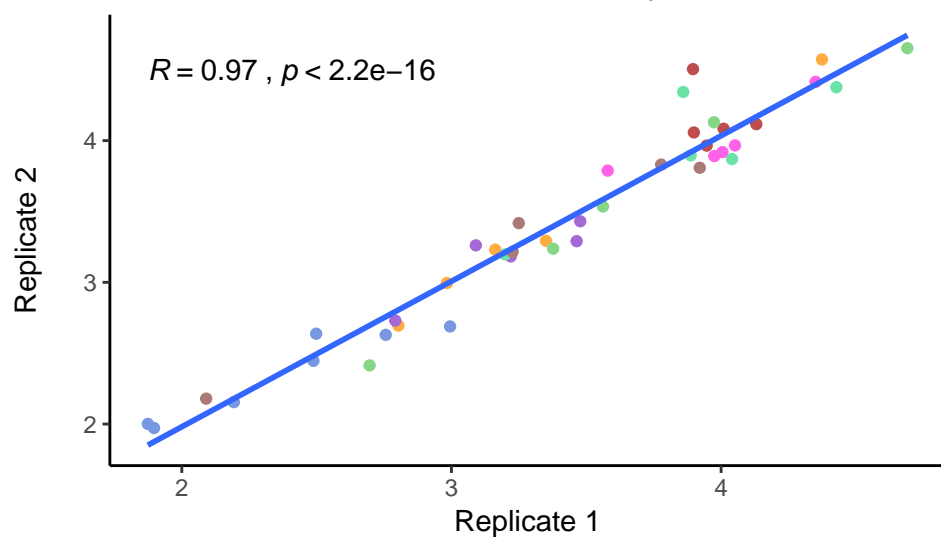

Faith's Phylogenetic diversity

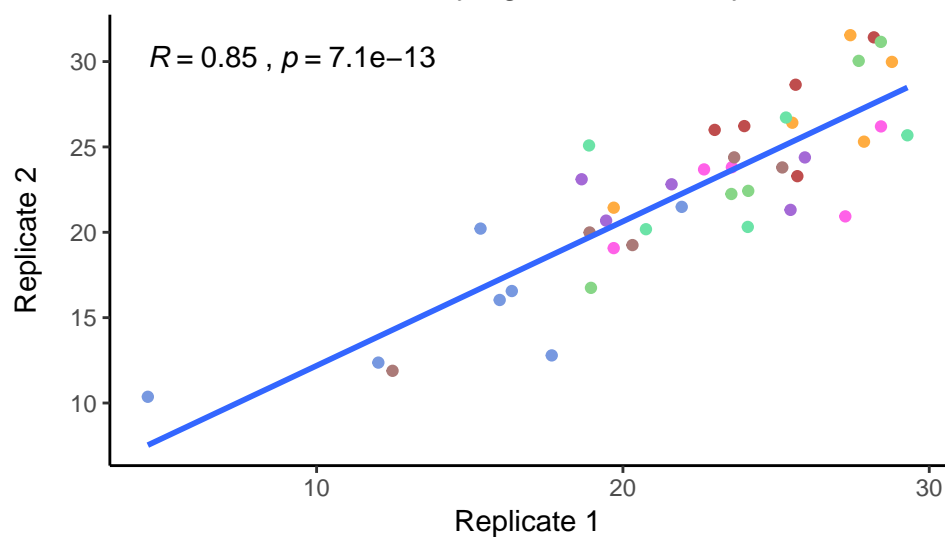

Simpson evenness

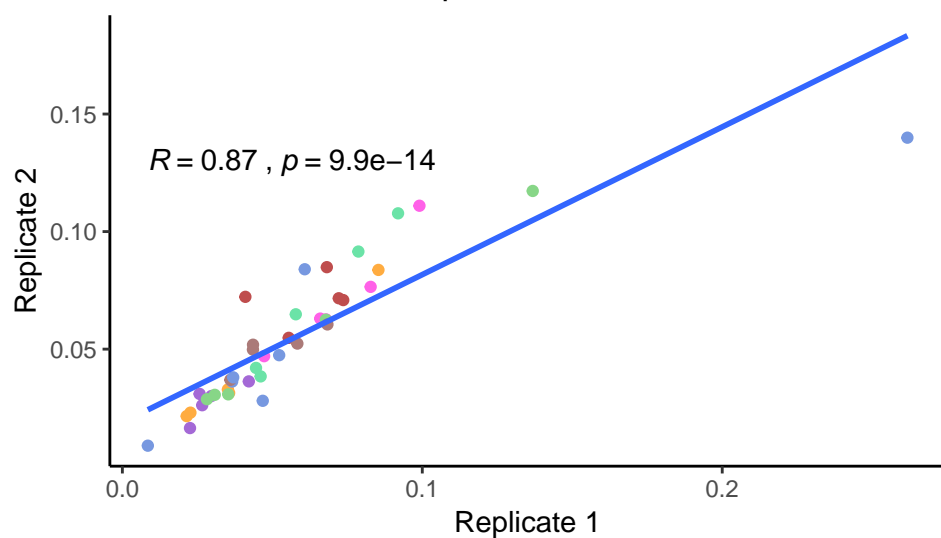

Simpson dominance

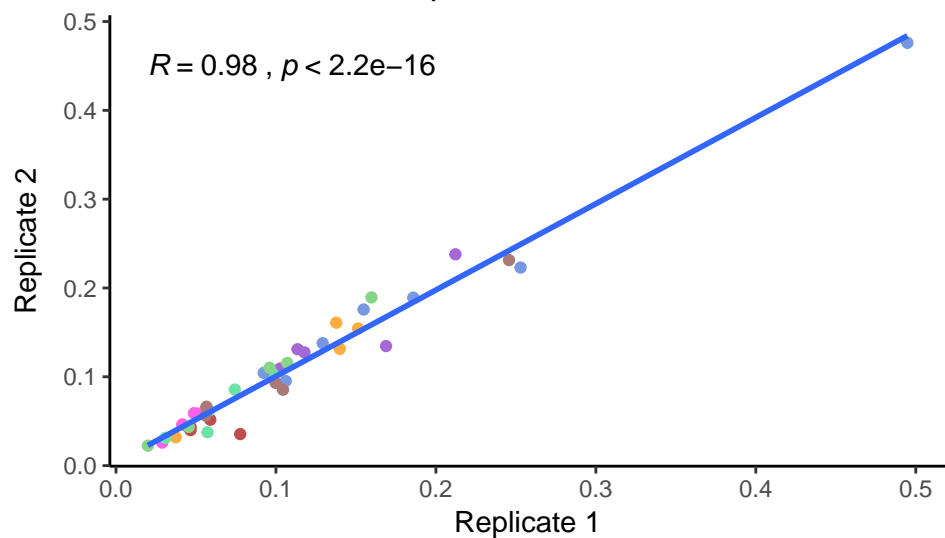

Population

|                                          |                                              |                                             |                                             |
|------------------------------------------|----------------------------------------------|---------------------------------------------|---------------------------------------------|
| <span style="color: orange;">●</span> Ba | <span style="color: purple;">●</span> Bg36   | <span style="color: cyan;">●</span> BgBRE   | <span style="color: brown;">●</span> BgNMRI |
| <span style="color: red;">●</span> Bg26  | <span style="color: magenta;">●</span> Bg121 | <span style="color: green;">●</span> BgBS90 | <span style="color: blue;">●</span> Water   |
