# Supplementary material
Source: PubMed Central journal article supplement (PMC8023393)

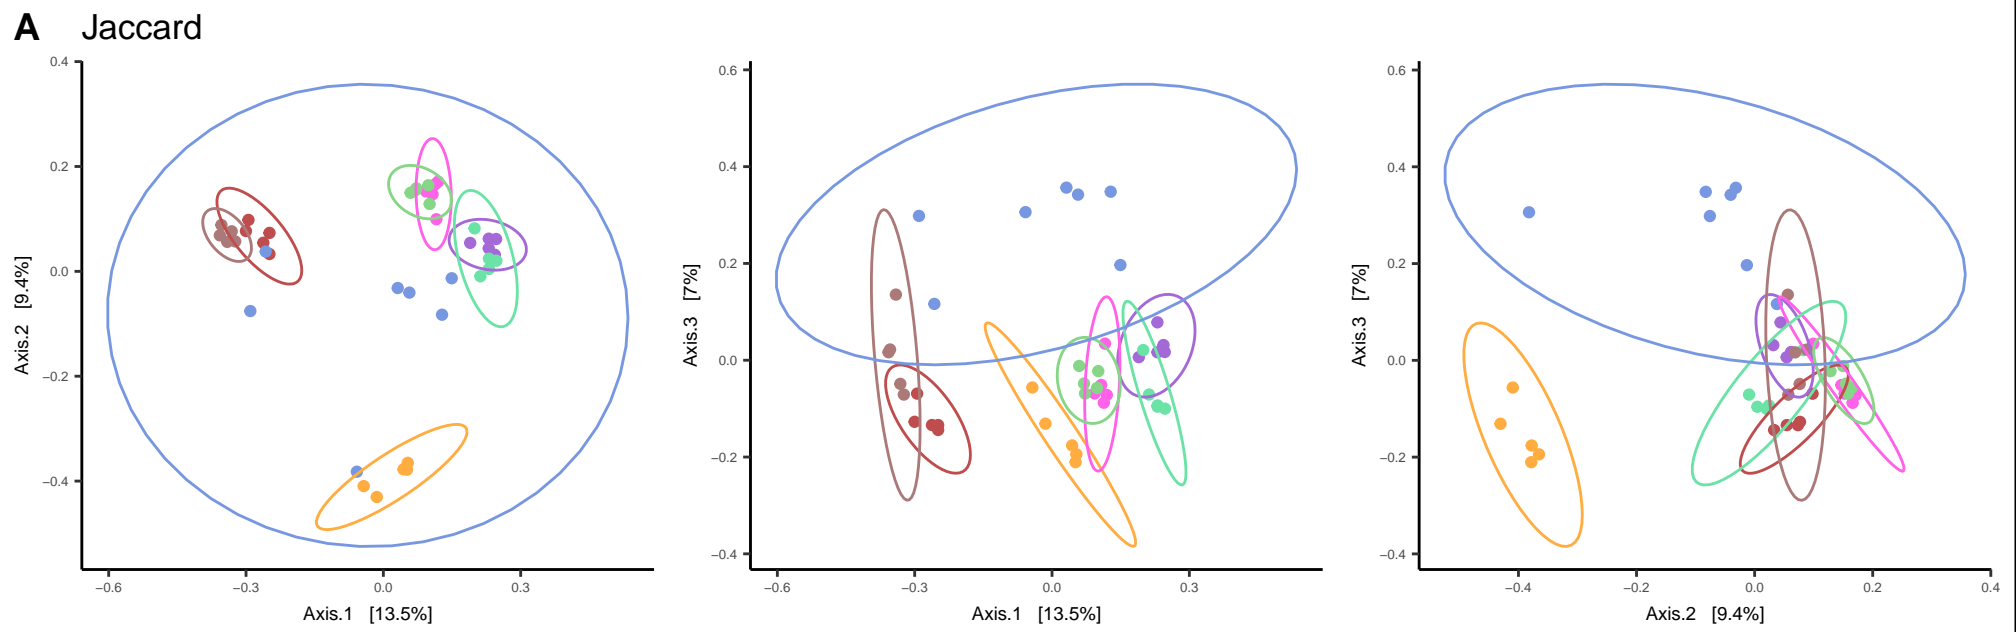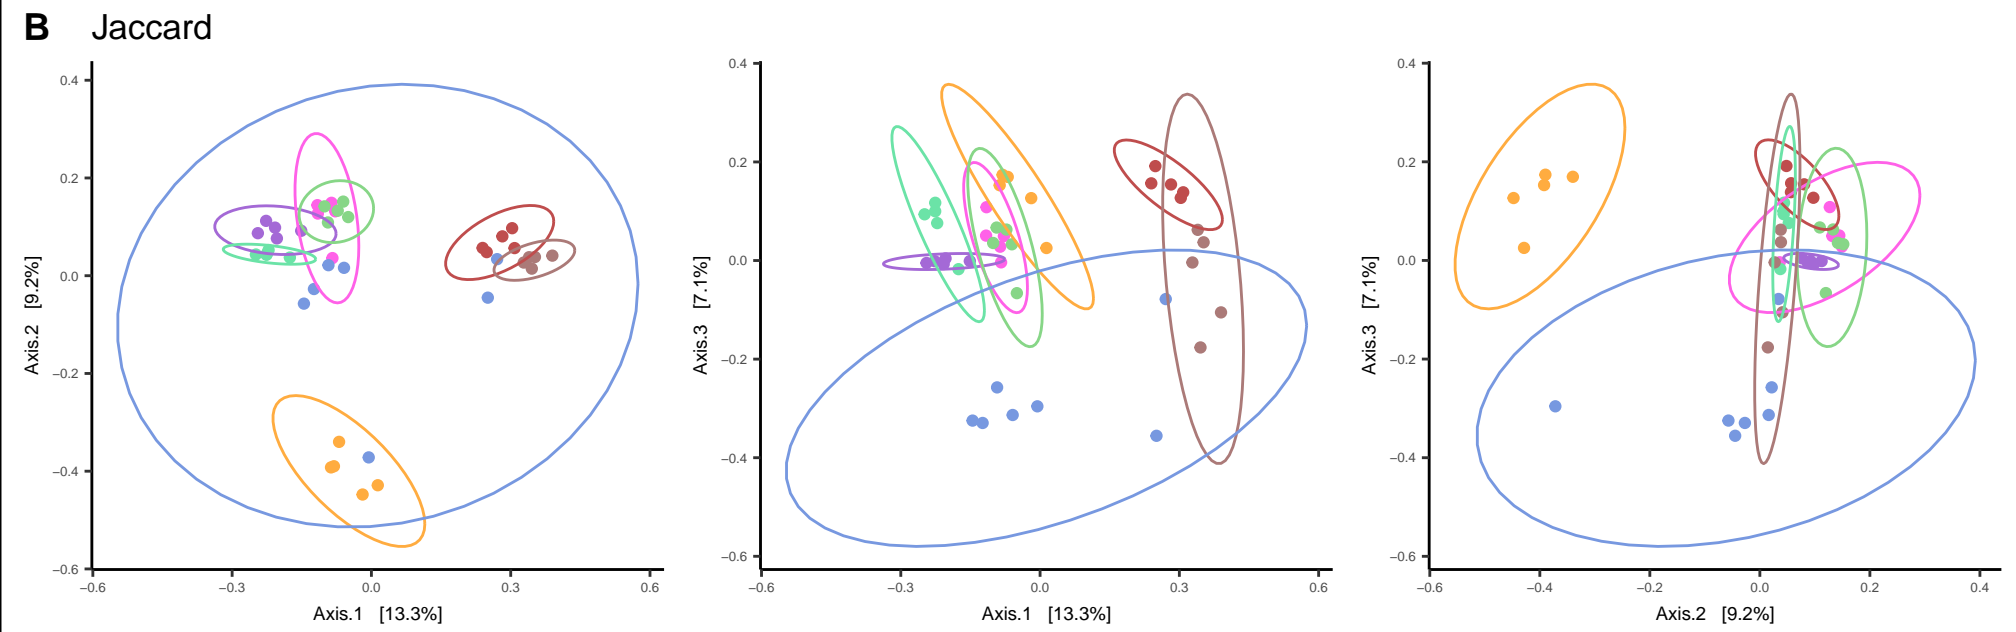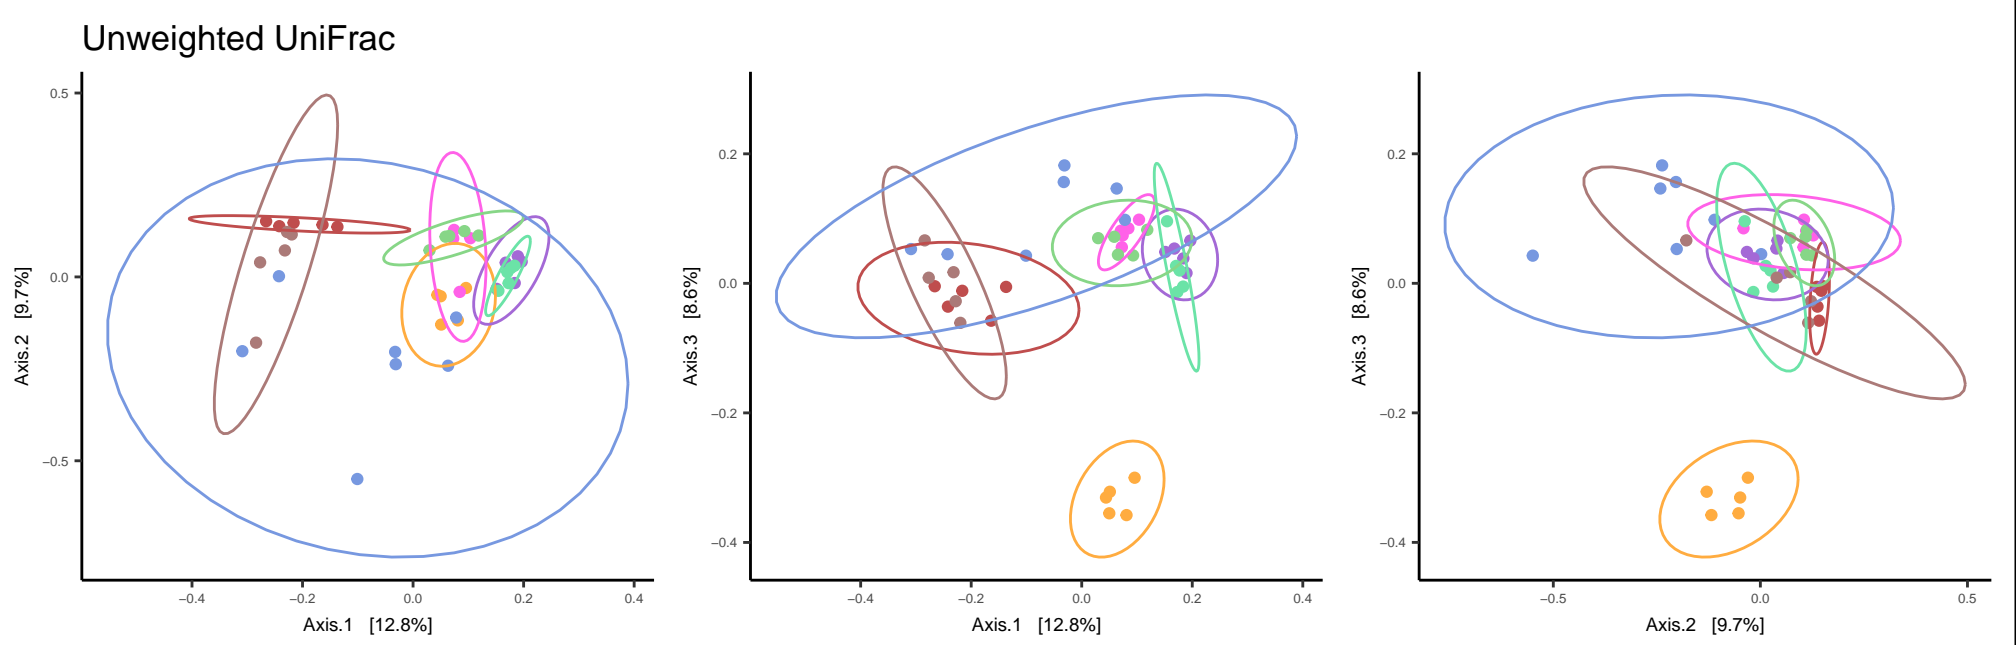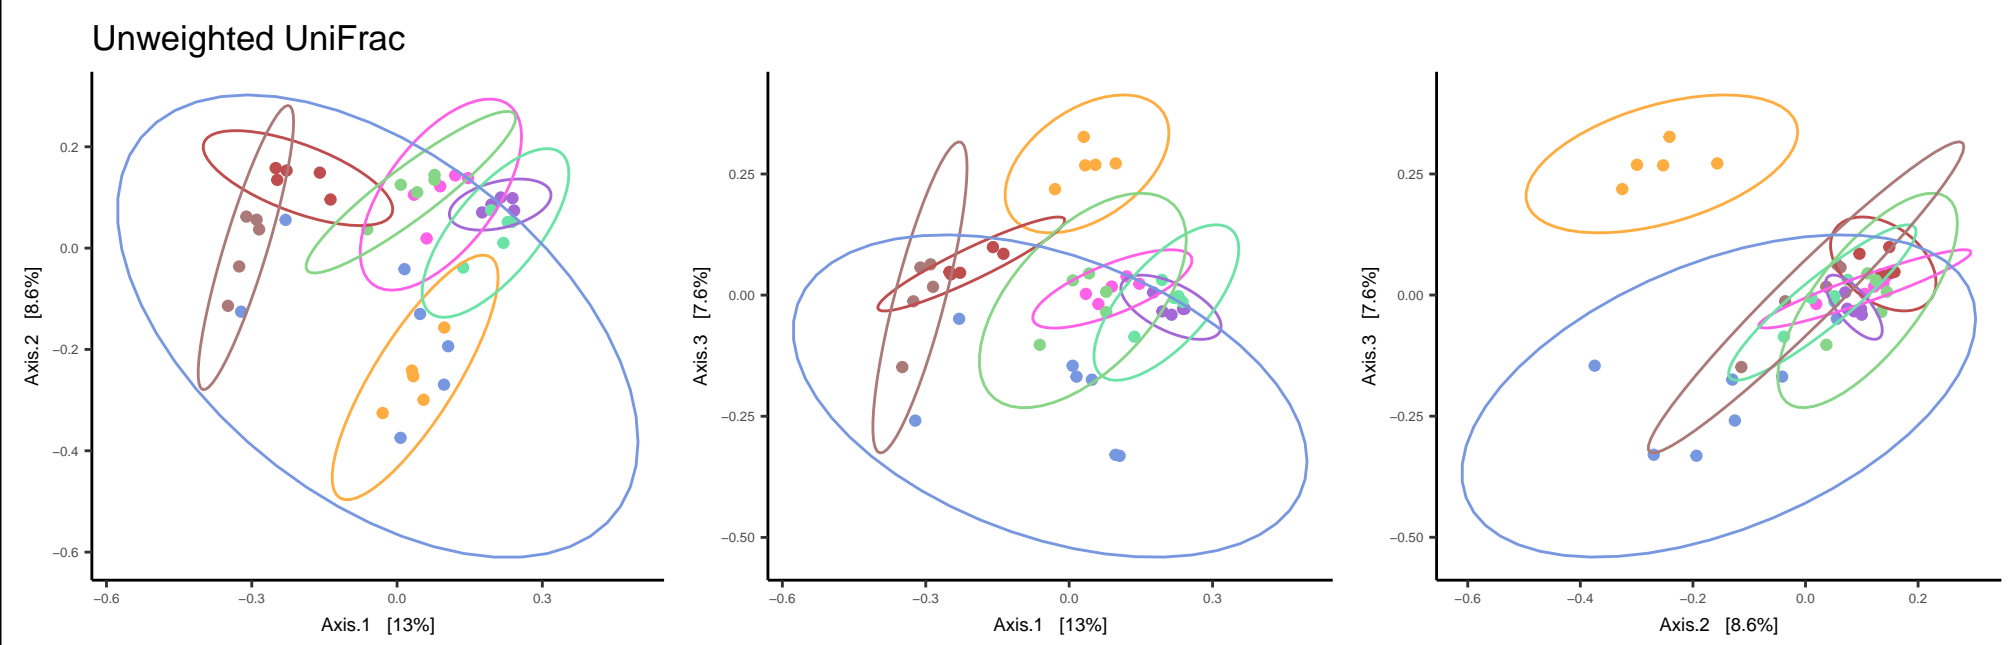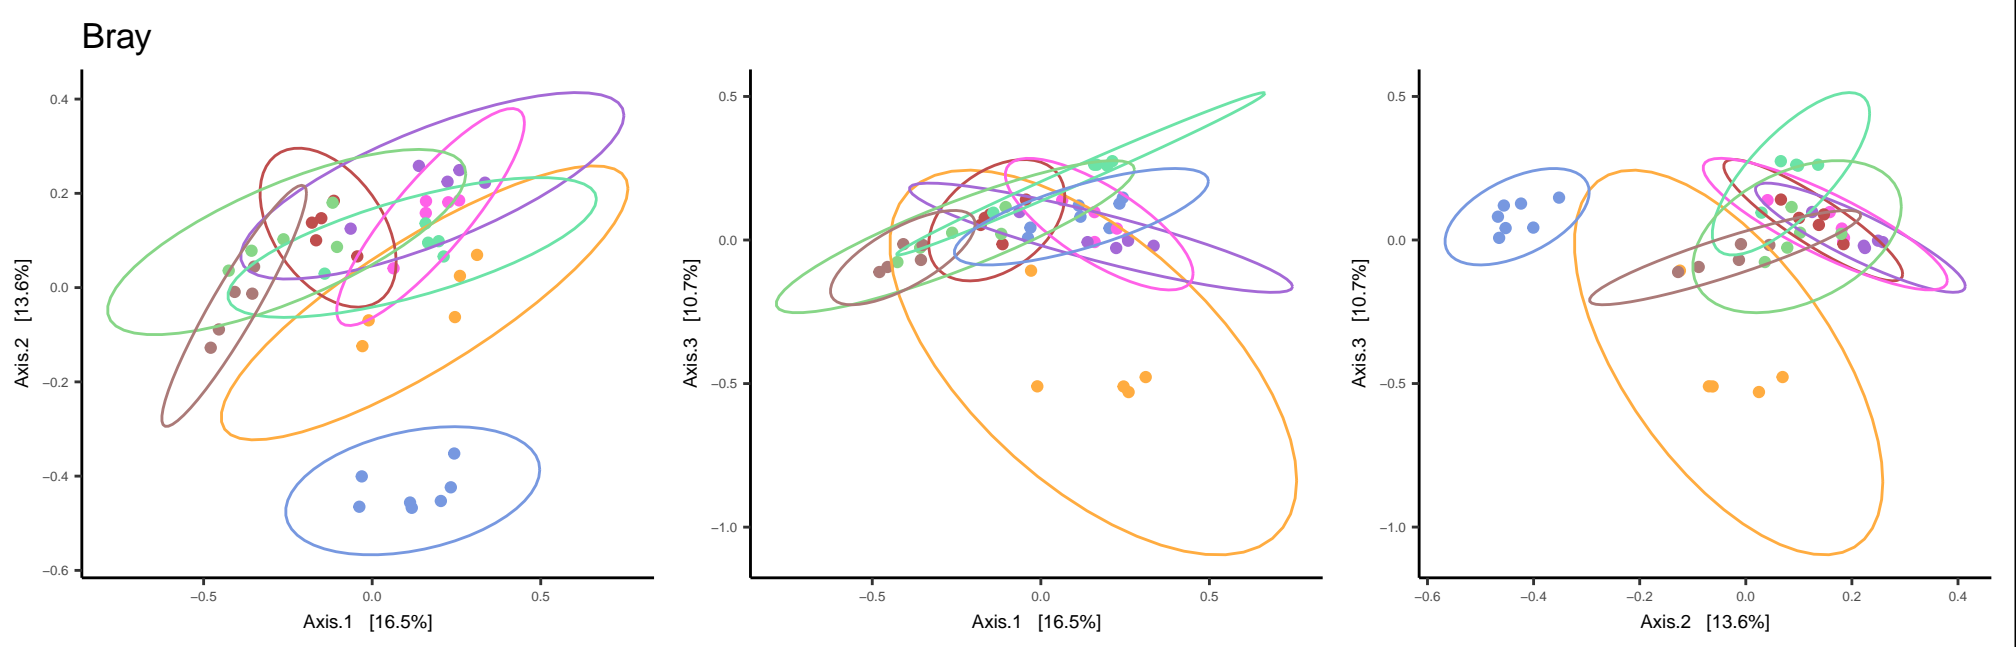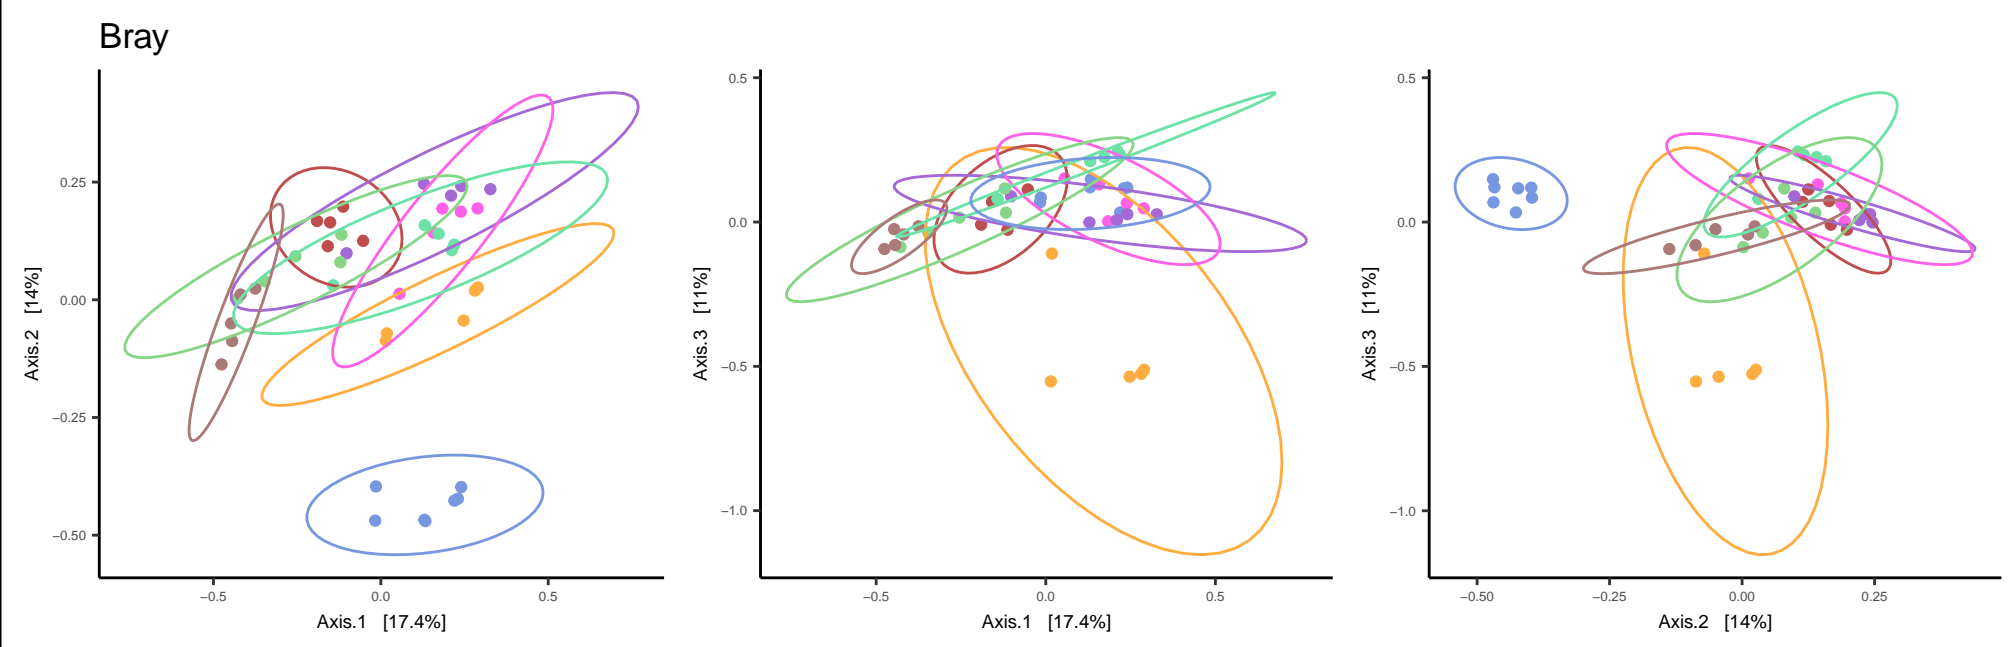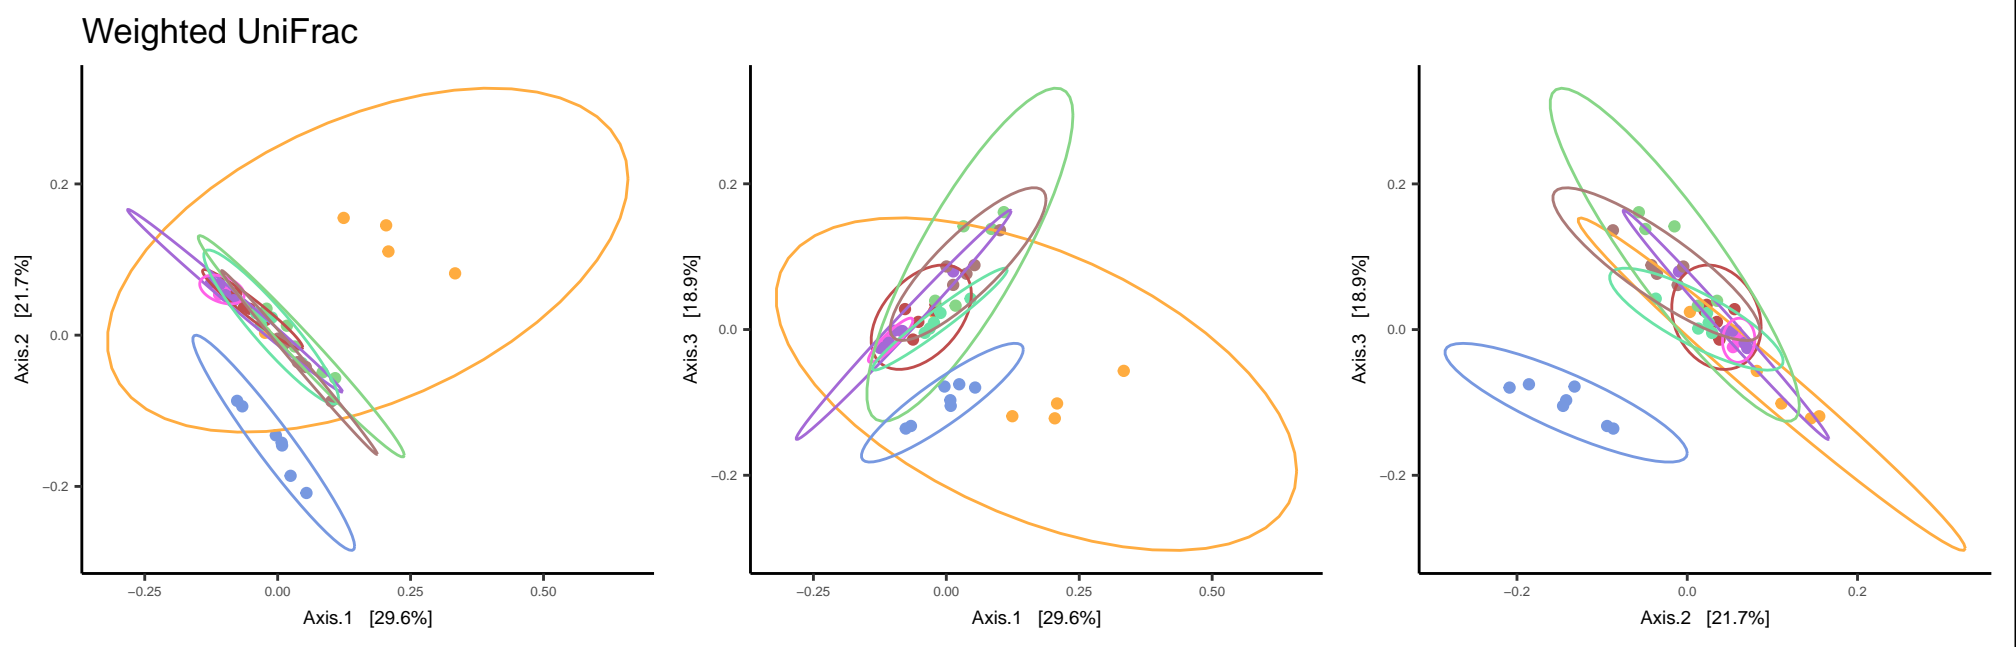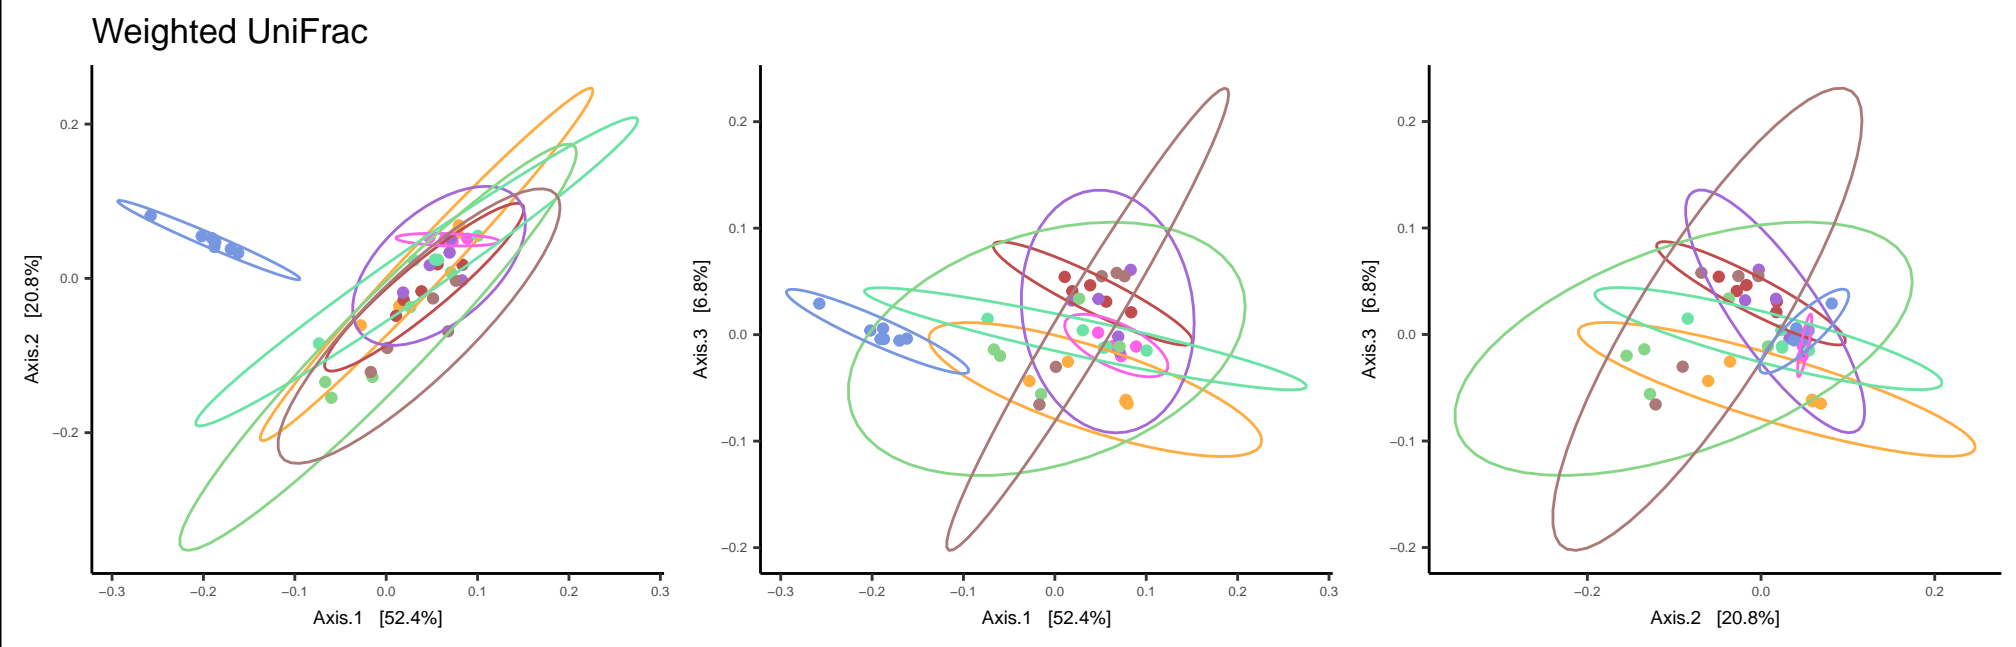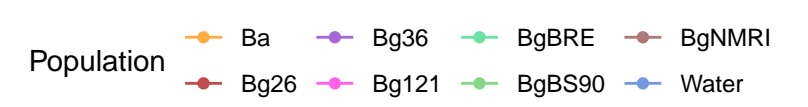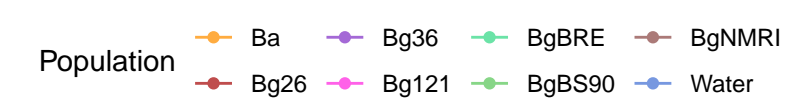

Supplement: NIHMS1678949-supplement-Supp__Fig__4.pdf [file NIHMS1678949-supplement-Supp__Fig__4.pdf]
