# Supplementary material
Source: PubMed Central journal article supplement (PMC8023393)
Supplement: NIHMS1678949-supplement-Supp__Fig__7.pdf [file NIHMS1678949-supplement-Supp__Fig__7.pdf]

# 16S library preparation gels

Plate 1  
(technical replicate)

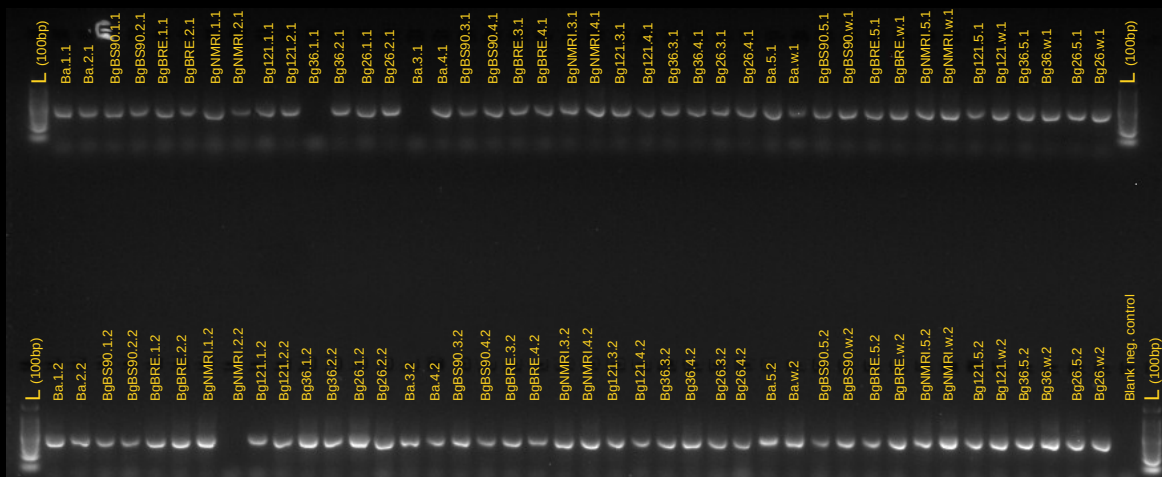

Plate 2  
(technical replicate)

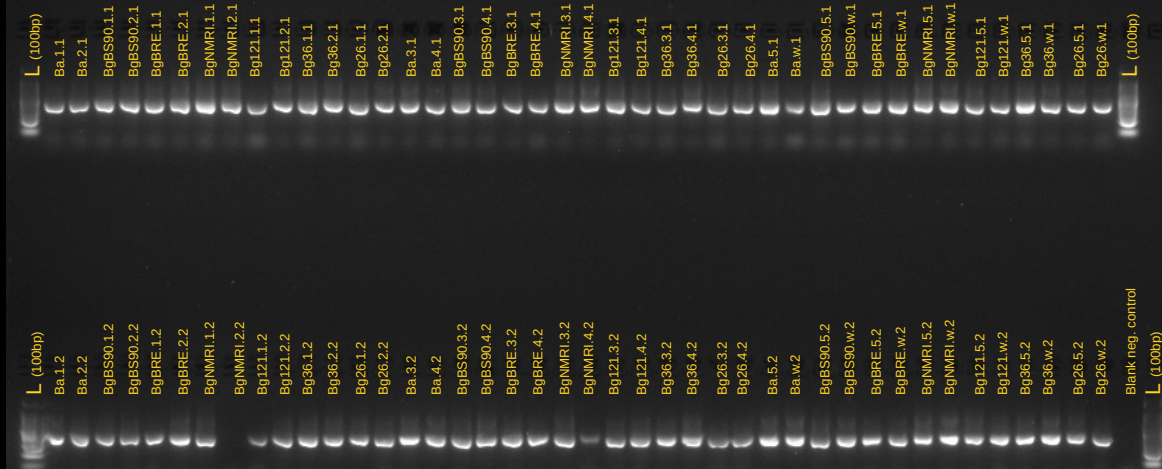

L : Ladder 100bp  
w : tank water

Plate 3  
(technical replicate)

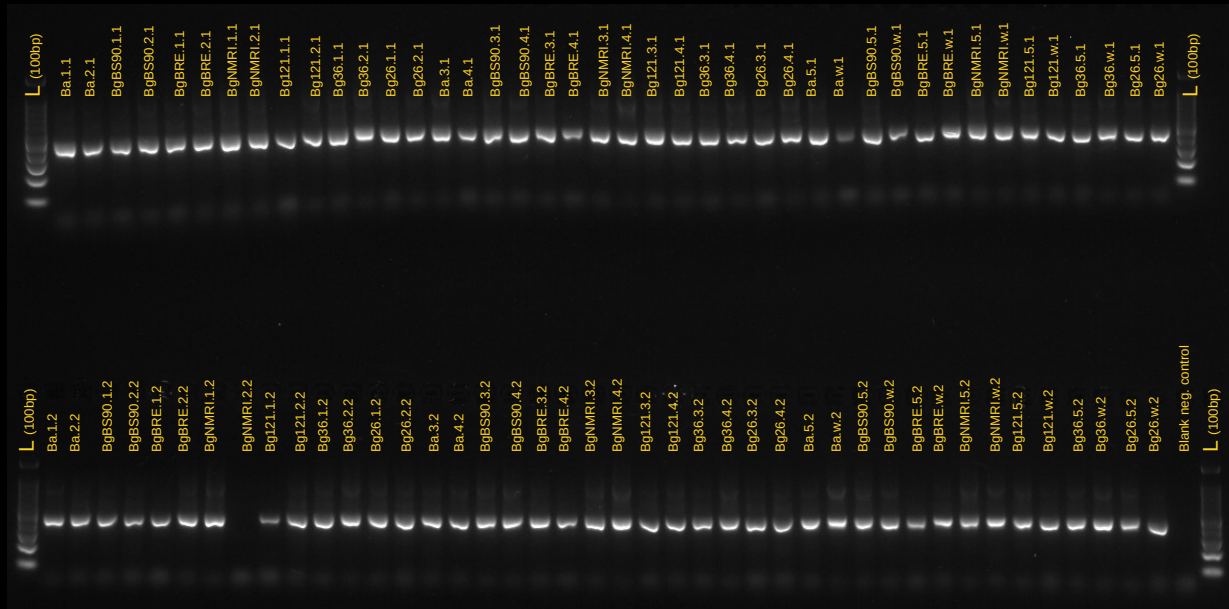

Plate 4  
(samples rerun when the first 16S PCR failed)

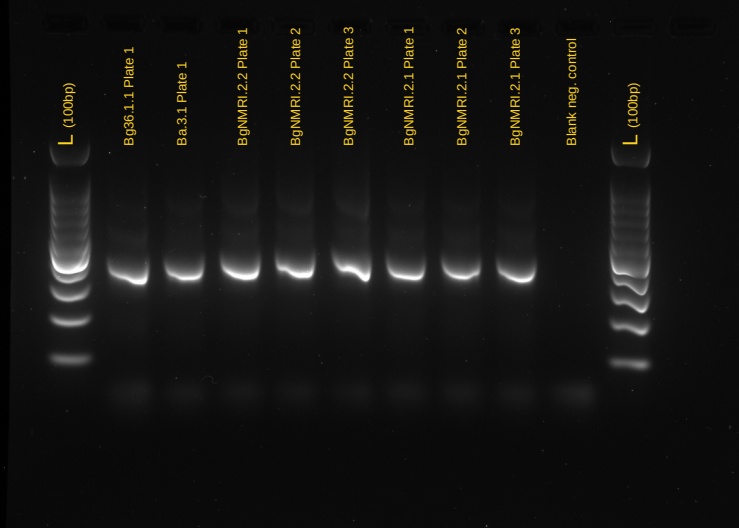

L : Ladder 100bp  
w : tank water
